# Supplementary material for: Development and Internal Validation of a Predictive Model for Postoperative Recovery Quality in Cardiovascular Surgery Patients Based on the QoR-15 Scale: A Retrospective Cohort Study
Source: Research Square preprint supplement (doi:10.21203/rs.3.rs-7106864/v1), 2025-11-19
Supplement: Supplementary file 1 [file 5e45ef6e5e2c13d333ee965b.docx]

**Supplementary Appendix 1**

**Standardized Anesthesia Management Protocol**

This appendix outlines the standardized anesthesia protocol applied to all patients undergoing cardiovascular surgery in this study. The protocol aimed to ensure hemodynamic stability, optimal organ perfusion, and uniform perioperative care.

**1. Preoperative Preparation**

**Monitoring setup:** After entering the operating room, patients received continuous electrocardiography (ECG), pulse oximetry (SpO₂), non-invasive blood pressure (NIBP), and bispectral index (BIS) monitoring.

**Peripheral venous access:** A 16-gauge catheter was inserted into the antecubital vein following local infiltration with 1% lidocaine.

**Arterial line placement:** The left radial artery was cannulated under local anesthesia for continuous invasive blood pressure monitoring, following confirmation with Allen’s test.

**2. Anesthesia Induction**

**Induction agents:** Midazolam (0.03-0.05 mg/kg), etomidate (0.2-0.3 mg/kg), sufentanil (0.3-0.5 μg/kg), and rocuronium (0.6-1.0 mg/kg) were administered intravenously.

**Airway management:** Endotracheal intubation was performed following adequate neuromuscular blockade.

**Central venous access:** A triple-lumen central venous catheter was placed via the right internal jugular vein under ultrasound guidance.

**3. Maintenance of Anesthesia**

**Intravenous agents:** Propofol (50-100 μg/kg/min), remifentanil (0.1-0.2 μg/kg/min), and dexmedetomidine (0.2-0.7 μg/kg/h) were continuously infused.

**Inhalational anesthetic:** Sevoflurane (1.0-2.0 vol%) was used for maintenance of anesthesia depth.

**Neuromuscular blockade:** Rocuronium was intermittently administered as needed.

**Intraoperative monitoring:** Transesophageal echocardiography (TEE) was routinely utilized to evaluate myocardial function, valvular status, and volume responsiveness.

**Cardiac output monitoring:** For patients undergoing complex aortic procedures, cardiac output (CO), stroke volume variation (SVV), and systemic vascular resistance (SVR) were continuously monitored using a Vigileo/Flotrac system connected to a femoral arterial line.

**4. Hemodynamic Management**

Vasoactive drugs (e.g., norepinephrine, dopamine) were administered through central venous access and titrated to maintain target blood pressure and perfusion indices.

Fluid therapy (crystalloids, autologous or stored blood) was guided by hemodynamic targets, blood loss, and urine output.

**5. Brain Protection Strategy (For Circulatory Arrest)**

For procedures involving hypothermic circulatory arrest (e.g., DeBakey type I aortic dissection), the following protective strategies were used:

1. Systemic cooling to ≤28°C
2. Administration of deep anesthesia before arrest
3. Application of scalp ice packs

**6. Transfer to ICU**

Following surgery, all patients were transferred to the intensive care unit (ICU) under mechanical ventilation and continuous monitoring for further postoperative care.

**Notes:**

1. All drugs and interventions were adjusted according to intraoperative events and individualized patient responses.
2. The protocol was developed in accordance with institutional standards and national guidelines for cardiac anesthesia.
